# Supplementary material for: Poly(pyrrole-co-aniline)@graphene oxide/Fe3O4 sorbent for the extraction and preconcentration of polycyclic aromatic hydrocarbons from water samples
Source: Royal Society of Chemistry journal article supplement (doi:10.1039/c8nj03936d), 2018-01-01
Supplement: c8nj03936d1.pdf [file c8nj03936d1.pdf]

**Electronic Supporting Information**

**Poly(pyrrole-co-aniline)@graphene oxide/Fe<sub>3</sub>O<sub>4</sub> sorbent for  
the extraction and preconcentration of polycyclic aromatic  
hydrocarbons from water samples**

**Amirhassan Amiri\*, Mehdi Baghayeri, Eliye Hamidi**

*Department of Chemistry, Faculty of Sciences, Hakim Sabzevari University, 9617976487,*

*Sabzevar, Iran*

\*Corresponding author:

E-mail: Amiri\_amirhassan@yahoo.com

Ah.amiri@hsu.ac.ir

Tel: +98 51 44013323

Fax: +98 51 44013170

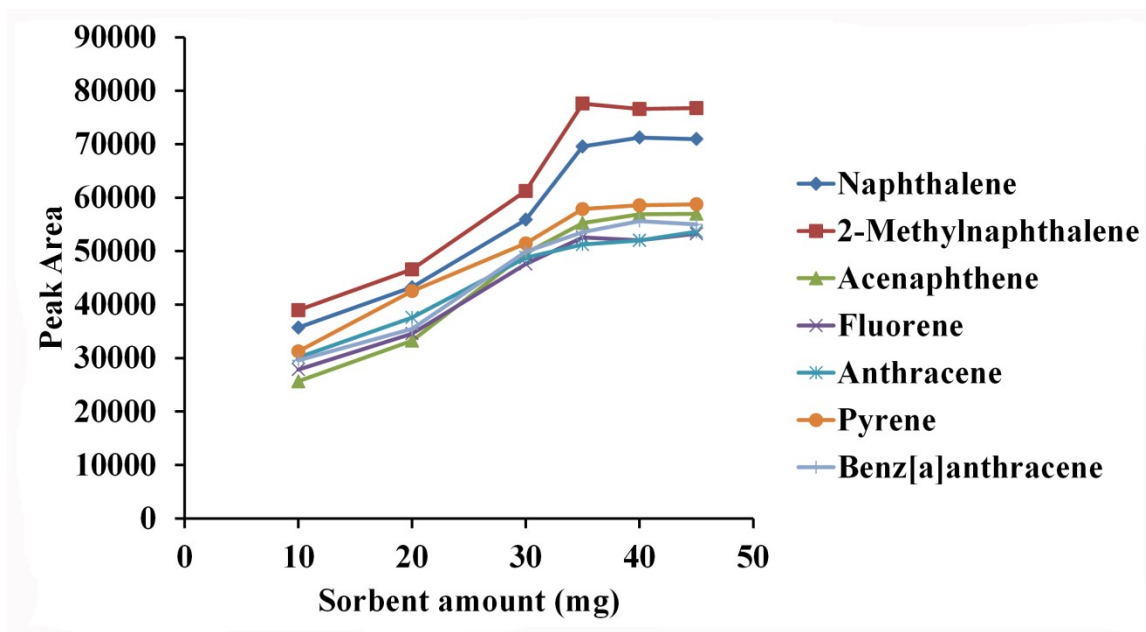

**Figure S1.** Effect of sorbent amounts on the extraction efficiency. Extraction conditions: sample volume, 30 mL; extraction time, 5 min; desorption solvent, 0.75 mL dichloromethane; desorption time, 5 min; and NaCl concentration, 10% w/v.

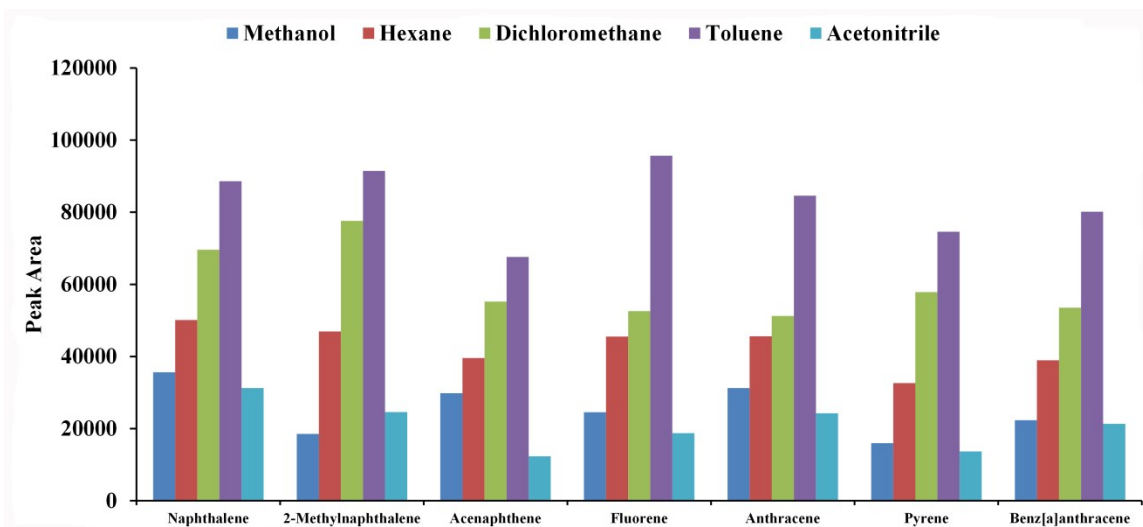

**Figure S2.** Effect of eluent type on the extraction efficiency. Extraction conditions: sample volume, 30 mL; extraction time, 5 min; desorption solvent volume, 0.75 mL; desorption time, 5 min; and NaCl concentration, 10% w/v.

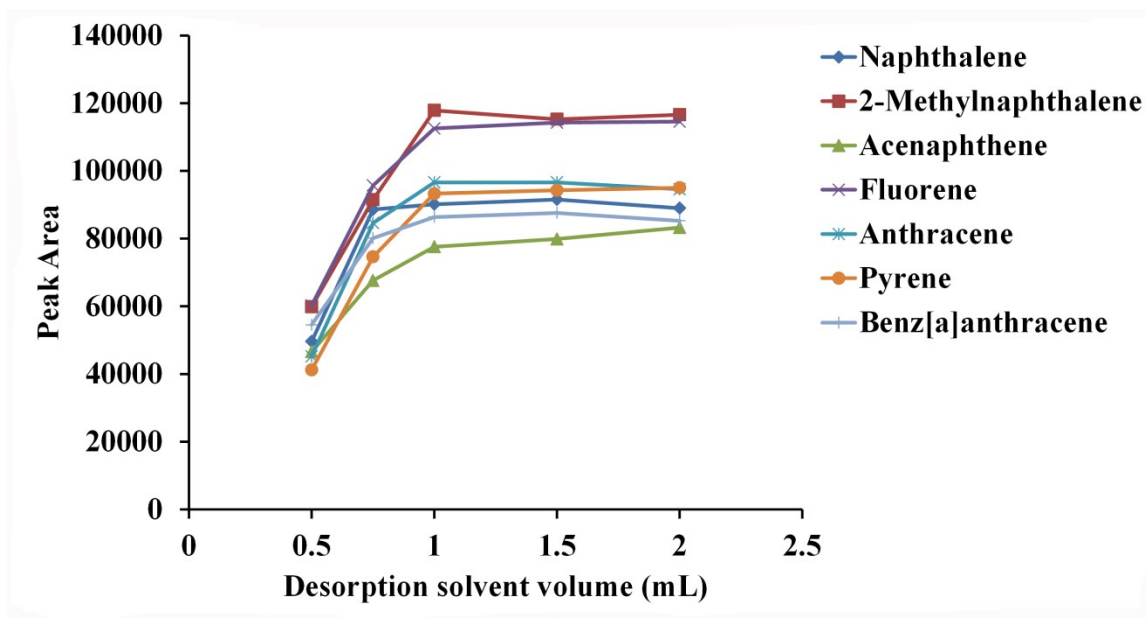

**Fig. S3.** Effect of desorption solvent volume on the extraction efficiency. Extraction conditions: sample volume, 30 mL; extraction time, 5 min; desorption solvent, toluene; desorption time, 5 min; and NaCl concentration, 10% w/v.

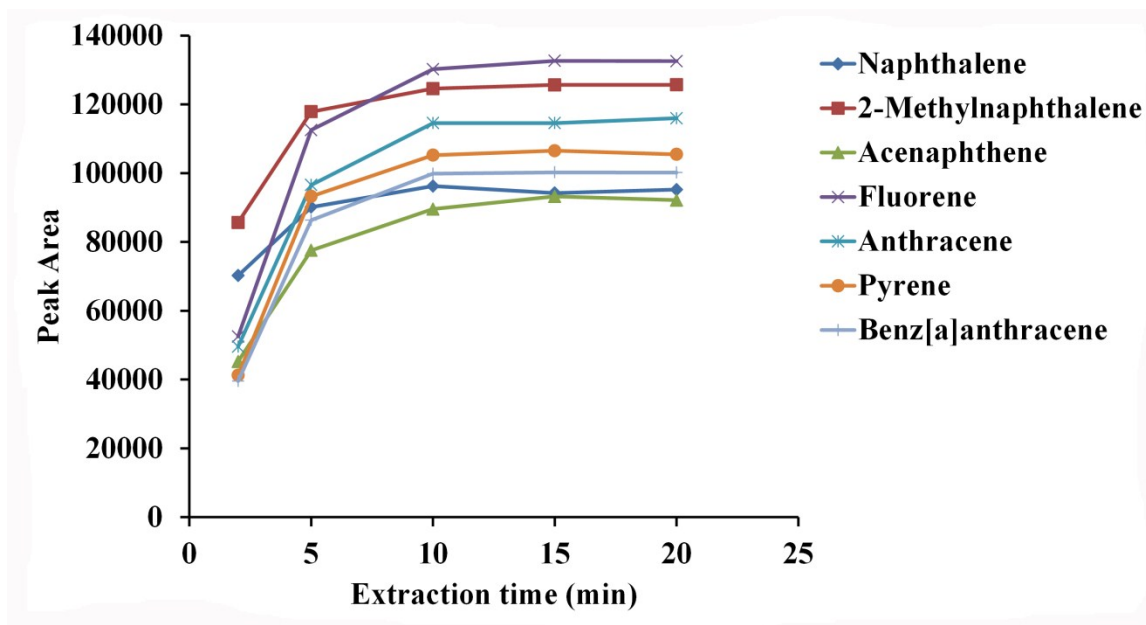

**Figure S4.** Effect of extraction time on the extraction efficiency. Extraction conditions: sample volume, 30 mL; desorption time, 5 min; desorption solvent, 1 mL toluene; and NaCl concentration, 10% w/v.

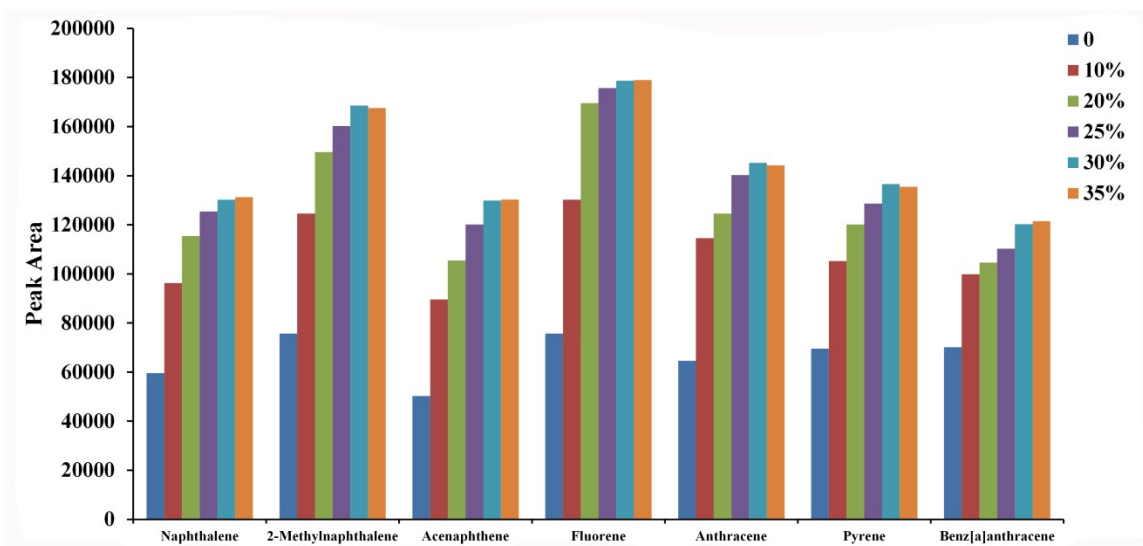

**Figure S5.** Effect of salt amount on the extraction efficiency. Extraction conditions: sample volume, 30 mL; extraction time, 10 min; desorption solvent, 1 mL toluene; desorption time, 5 min.
